# Supplementary material for: Evidence of the bottom stiffness effect on atomic force microscopy-based cell mechanobiology
Source: Royal Society of Chemistry journal article supplement (doi:10.1039/d5nr01236h), 2025-01-01
Supplement: d5nr01236h1.pdf [file d5nr01236h1.pdf]

## **Evidence of the bottom stiffness effect on atomic force microscopy-based cell mechanobiology**

Afonso L.D. Moura,<sup>‡a,b</sup> Jaime R. Tejedor,<sup>‡a</sup> Francisco M. Espinosa,<sup>a</sup> Lázaro A. Dominguez,<sup>a</sup> Jeanlex S. de Sousa<sup>b</sup> and Ricardo Garcia<sup>\*a</sup>

### **Summary nanomechanical values on HeLa cells**

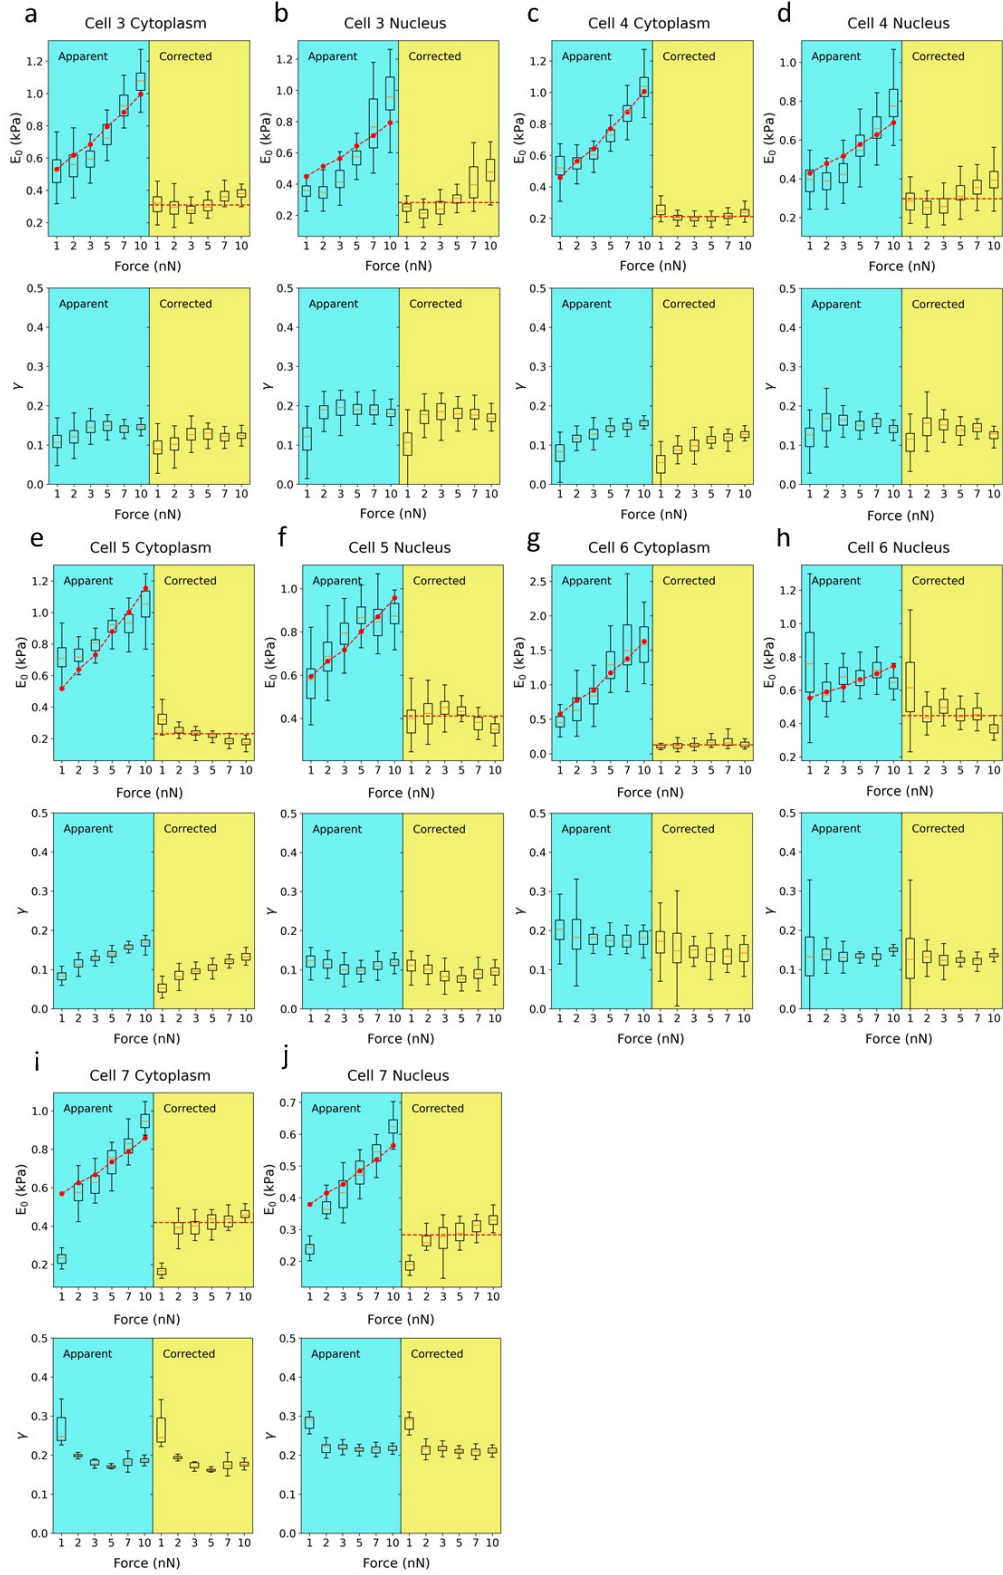

**Fig. S1** Apparent and corrected nanomechanical parameters of HeLa cells cultured on a Petri-dish. (a), (b) Modulus and fluidity coefficients obtained over a cytoplasmatic and nuclear regions (cell 3). (c), (d) cell 4. (e), (f) cell 5. (g), (h) cell 6. (i), (j) cell 7. Apparent values were obtained by fitting the force-distance curves with the semi-infinite single power-law rheology model. Corrected values were obtained by fitting the FDCs with the single power-law rheology model that includes bottom-effect corrections.
